# Supplementary material for: Defect Passivation Using Trichloromelamine for Highly Efficient and Stable Perovskite Solar Cells
Source: MDPI journal article supplement (doi:10.3390/polym14030398), 2022-01-20
Supplement: s1 [file s1]

## Supporting Information

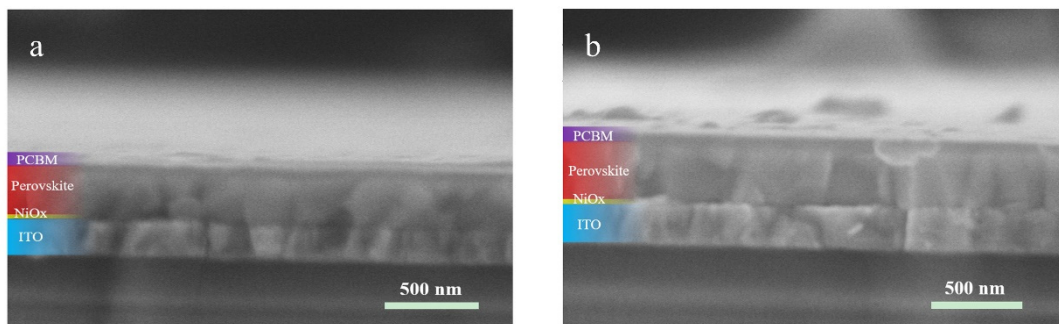

Figure S1. Cross-sectional SEM images of perovskite devices: (a) control and (b) 0.05 TCM additive.

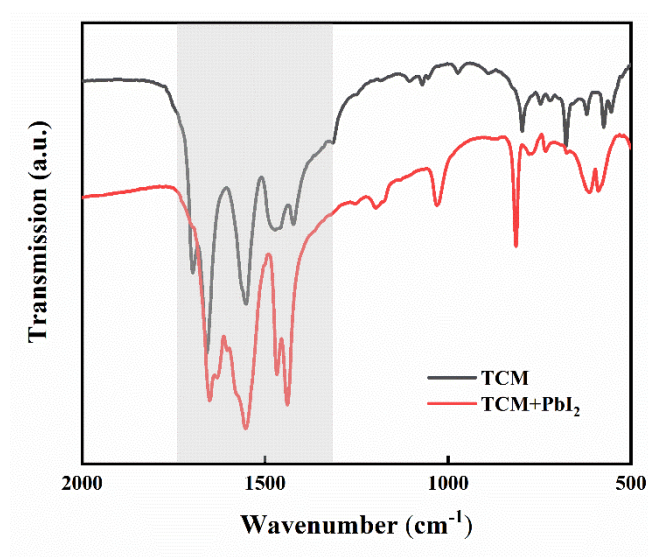

Figure S2. FT-IR spectrum of pure TCM and PbI<sub>2</sub> mixed with TCM.

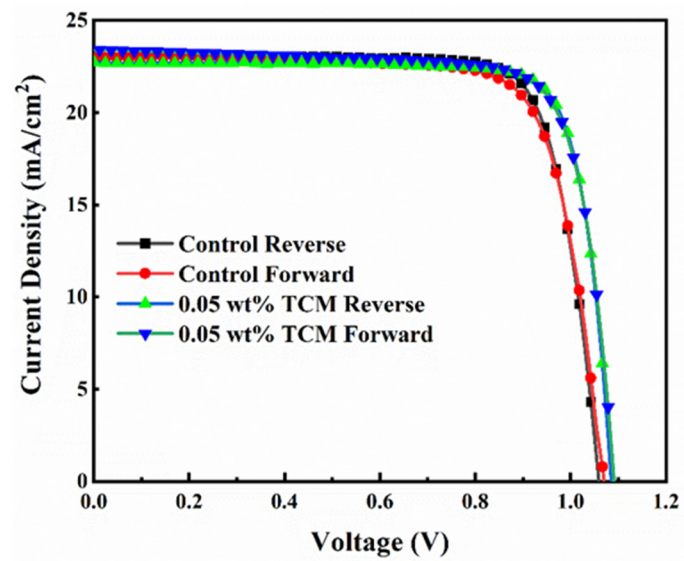

Figure S3.  $J$ - $V$  curve of forward and reverse voltage scanning of the best control device and 0.05 TCM device.

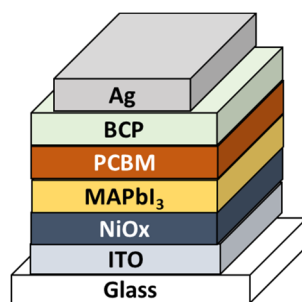

Figure S4. Device configuration of inverted perovskite solar cells
